# Supplementary material for: Corrosion Resistance and Conductivity of Ta-Nb-N-Coated 316L Stainless Steel as Bipolar Plates for Proton Exchange Membrane Fuel Cells
Source: MDPI journal article supplement (doi:10.3390/coatings14050542), 2024-04-26
Supplement: s1 [file s1]

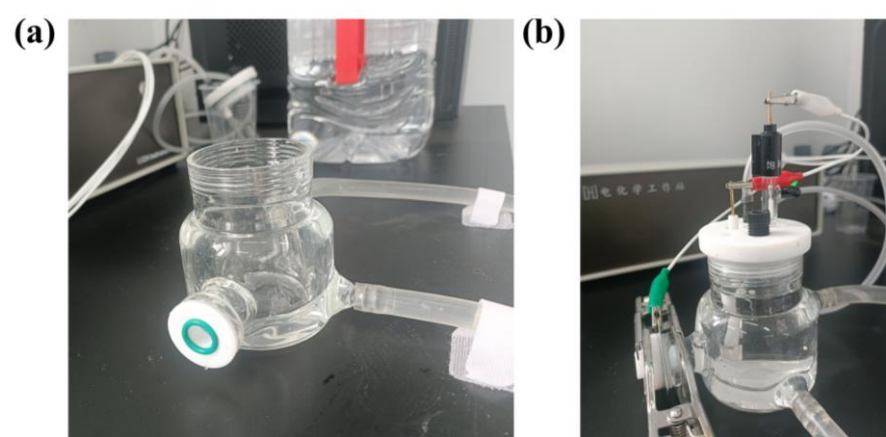

**Figure S1.** Diagram of the electrochemical test device.

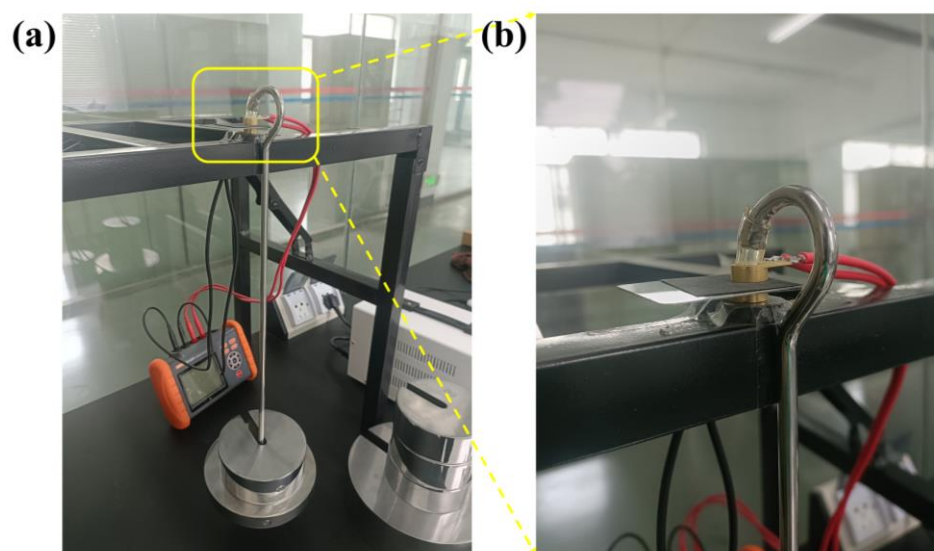

**Figure S2.** (a) Schematic illustration of the technique used for the ICR test. (b) Partial enlargement of the device.
